# Supplementary material for: Trends in Mental Wellbeing of US Children, 2019–2022: Erosion of Mental Health Continued in 2022
Source: MDPI journal article supplement (doi:10.3390/ijerph21020132), 2024-01-25

| Table S1: Correlates of poor mental health outcomes by age group |             |           |            |             |
|------------------------------------------------------------------|-------------|-----------|------------|-------------|
| Variables                                                        | Full Sample | 2-5 Years | 6-11 Years | 12-17 Years |
| Age                                                              | 0.05*       | 0.20*     | 0.00       | -0.30*      |
| Female Sex                                                       | -0.32*      | -0.25*    | -0.53*     | -0.17*      |
| Race                                                             |             |           |            |             |
| <i>White (Reference)</i>                                         |             |           |            |             |
| <i>Black</i>                                                     | -0.43*      | -0.08     | -0.57*     | -0.57*      |
| <i>Hispanic</i>                                                  | -0.33*      | -0.12*    | -0.44*     | -0.37*      |
| <i>Asian</i>                                                     | -0.64*      | -0.18*    | -0.71*     | -0.90*      |
| <i>American or Indian native</i>                                 | -0.28*      | -0.22     | -0.42      | -0.14       |
| <i>Other</i>                                                     | -0.46*      | -0.24     | -0.51*     | -0.53*      |
| Household Size                                                   | -0.03       | -0.05     | -0.09*     | -0.02       |
| Good or better self-rated health                                 | -2.60*      | -1.22*    | -2.80*     | -2.78*      |
| Insurance coverage                                               |             |           |            |             |
| <i>Private (Reference)</i>                                       |             |           |            |             |
| <i>Medicaid and Other public</i>                                 | 0.24*       | 0.05      | 0.23*      | 0.40*       |
| <i>Other</i>                                                     | 0.10        | 0.17      | -0.03      | 0.13        |
| <i>Uninsured</i>                                                 | -0.25*      | -0.05     | -0.33*     | -0.24*      |
| Family Structure                                                 |             |           |            |             |
| <i>Single Parent (Reference)</i>                                 |             |           |            |             |
| <i>Married two parents</i>                                       | -0.19*      | 0.03      | -0.17      | -0.27*      |
| <i>Cohabiting Two parent</i>                                     | -0.24*      | -0.03     | -0.24      | 0.16        |
| <i>No parent</i>                                                 | 0.26        | 0.28      | 0.47       | 0.12        |
| Parental Age (First residential parent)                          | 0.00        | 0.00      | 0.01       | 0.00        |
| Family Race Composition                                          |             |           |            |             |
| <i>Same race family (Reference)</i>                              |             |           |            |             |
| <i>Mixed race family</i>                                         | 0.52*       | 0.26      | 0.49*      | 0.72*       |
| <i>Unknown or no parent</i>                                      | -0.18*      | -0.08     | -0.17      | -0.23*      |
| Parental Employment                                              | -0.18*      | -0.03     | -0.17*     | -0.31*      |
| At least one parent has a college degree                         | 0.00        | -0.09     | 0.05       | 0.00        |
| Federal Poverty Line based family income categories              |             |           |            |             |
| 0.0-0.49 ( <i>Reference</i> )                                    |             |           |            |             |
| 0.50-0.74                                                        | 0.07        | 0.27      | 0.06       | -0.17       |
| 0.74-0.99                                                        | -0.03       | -0.01     | 0.18       | -0.30       |
| 1.00-1.24                                                        | 0.04        | 0.27      | 0.02       | -0.18       |
| 1.25-1.49                                                        | -0.17       | -0.03     | 0.03       | -0.56*      |
| 1.50-1.74                                                        | -0.12       | 0.01      | -0.04      | -0.37       |
| 1.75-1.99                                                        | 0.05        | 0.09      | 0.23       | -0.27       |
| 2.00-2.49                                                        | -0.15       | -0.08     | -0.26      | -0.27       |
| 2.50-2.99                                                        | -0.01       | -0.03     | 0.02       | -0.13       |
| 3.00-3.49                                                        | -0.04       | -0.01     | -0.12      | -0.07       |
| 3.50-3.99                                                        | 0.04        | 0.00      | -0.08      | 0.06        |
| 4.00-4.49                                                        | 0.05        | -0.13     | 0.16       | -0.08       |
| 4.50-4.99                                                        | -0.08       | -0.14     | -0.19      | 0.00        |
| 5.00 or greater                                                  | -0.07       | -0.13     | -0.15      | -0.08       |
| High Food security                                               | -0.50*      | -0.14     | -0.62*     | -0.61*      |
| Owned Residence                                                  | -0.06       | -0.04     | -0.12      | 0.00        |
| At least one elderly person lives in house                       | 0.15        | 0.28      | 0.12       | 0.11        |

1. Single asterisk (\*) indicates significance at  $p < 0.05$
2. Coefficients indicate change in summary scores for mental distress. Summary scores were unweighted sums of responses to binary survey items. Summary score maximums varied by age subgroup depending on the total number of survey items asked of respondents belonging to each subgroup

**Figure S1: Mean prevalence of key metrics of mental wellbeing across study years in all children by domain**

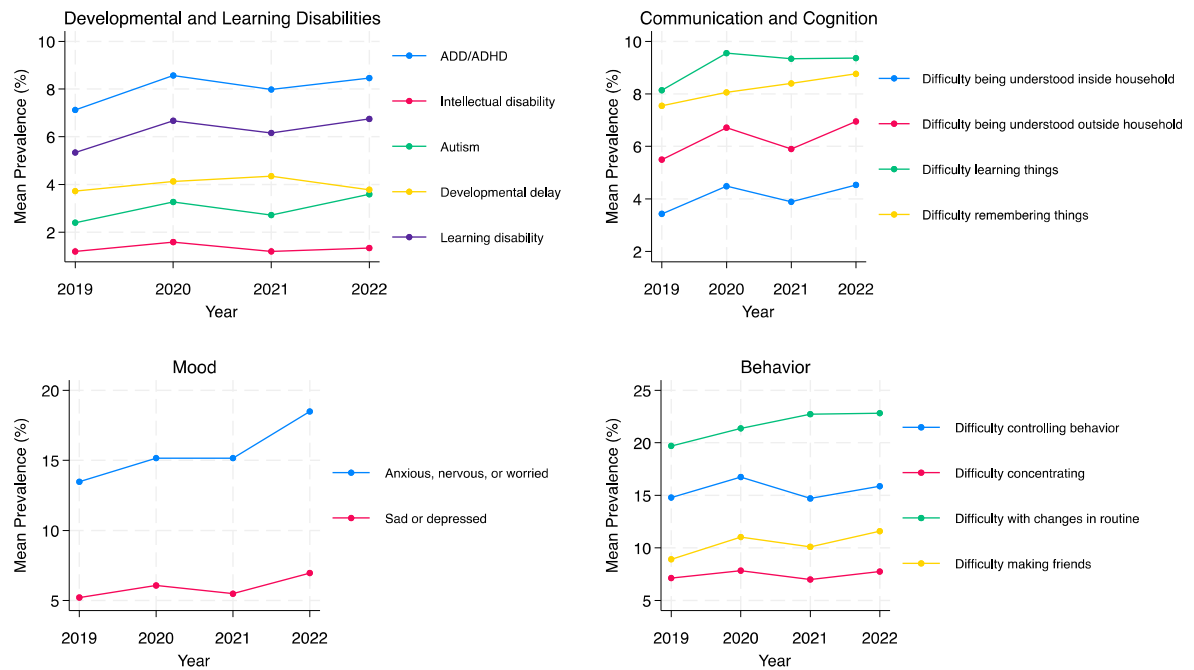

Supplement: s1 [file s1]
